# Supplementary material
Source: PubMed Central journal article supplement (PMC7757722)
Supplement: NIHMS1652557-supplement-Supplementary_Information.pdf [file NIHMS1652557-supplement-Supplementary_Information.pdf]

# Supporting Information

## One enzyme reverse transcription qPCR using Taq DNA polymerase

*Sanchita Bhadra, Andre C. Maranhao, Inyup Paik, and Andrew D. Ellington\**

\* Department of Molecular Biosciences, College of Natural Sciences, The University of  
Texas at Austin, Austin, TX 78712, USA.

Center for Systems and Synthetic Biology, The University of Texas at Austin, Austin, TX  
78712, USA.

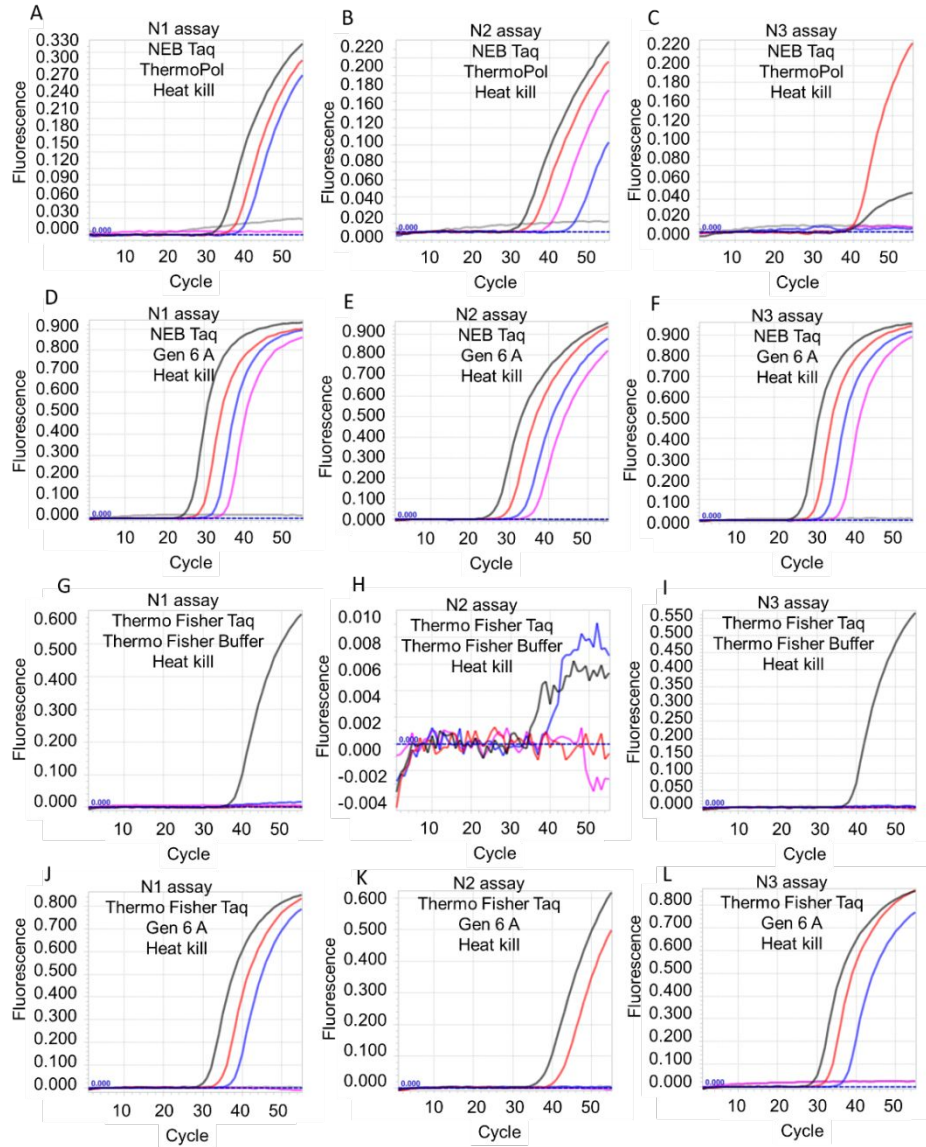

**Figure S1.** Effect of heat kill step prior to reverse transcription on Taq DNA polymerase TaqMan RT-qPCR assays. CDC SARS-CoV-2 N1, N2, and N3 TaqMan RT-qPCR assays were setup using NEB (panels A-F) or Thermo Fisher (panels G-L) Taq DNA polymerase and their companion commercial buffers or Gen 6 A buffer. Amplification curves resulting

from 6000 (black traces), 600 (red traces), 60 (blue traces), 6 (pink traces), and 0 (gray traces) copies of SARS-CoV-2 genomic RNA are depicted.

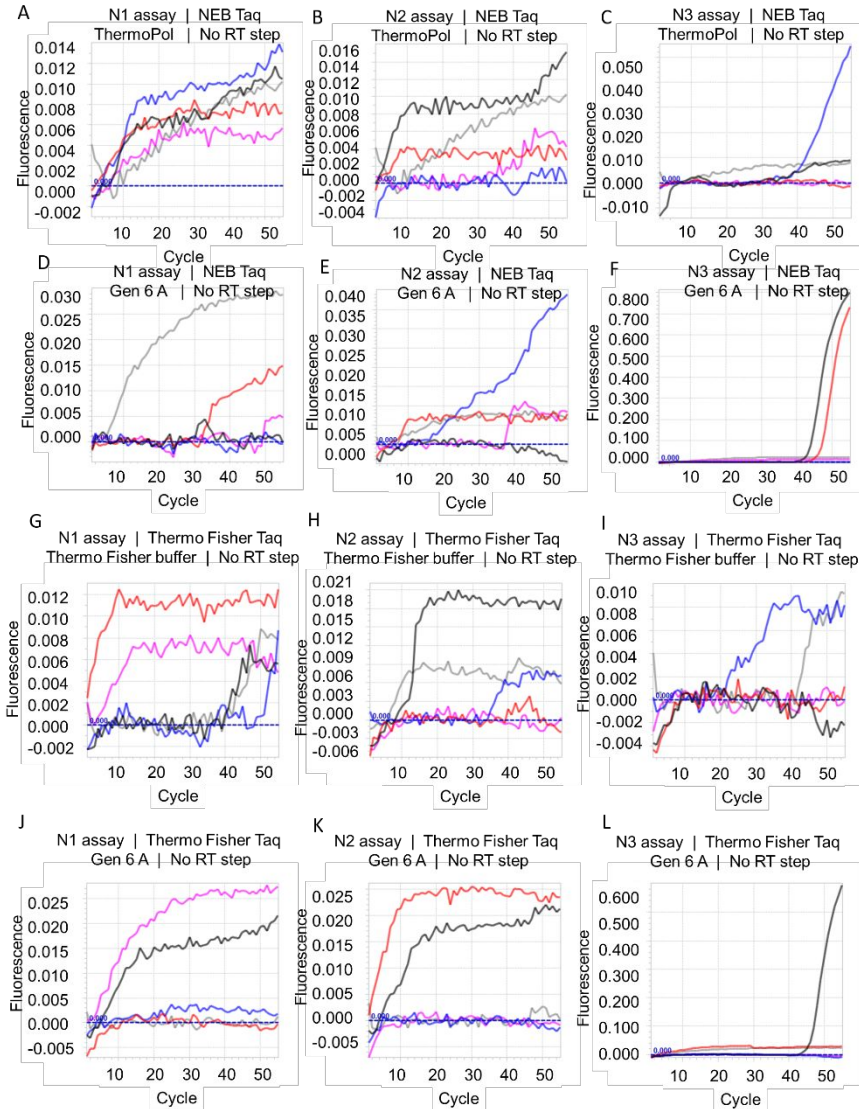

**Figure S2.** Effect of eliminating the reverse transcription step prior to qPCR cycling on Taq DNA polymerase-mediated TaqMan RT-qPCR assays. CDC SARS-CoV-2 N1, N2,

and N3 TaqMan RT-qPCR assays were setup using NEB (panels A-F) or Thermo Fisher (panels G-L) Taq DNA polymerase and their companion commercial buffers or Gen 6 A buffer. Amplification curves resulting from 6000 (black traces), 600 (red traces), 60 (blue traces), 6 (pink traces), and 0 (gray traces) copies of SARS-CoV-2 genomic RNA are depicted.
